# Supplementary material
Source: HighWire-hosted journal article supplement (doi:10.1101/rna.079874.123)
Supplement: Supplemental_Legend.docx [file Supplemental_Legend.docx]

# Supplemental Figure Legend:

This letter reflects the author’s interest at the time in the possibility of deploying pseudouridine, as the deoxynucleoside, in automated chemical synthesis of antisense DNA oligos. The respondent was a pioneer in nucleic acids, among other things having established the 5ʹ to 3ʹ phosphodiester linkage. At the time of this communication we were on the Scientific Advisory Board of the early antisense DNA company Hybridon (Pederson, 2012).
