# Supplementary material
Source: HighWire-hosted journal article supplement (doi:10.1101/rna.079874.123)
Supplement: SupplementalFig1.pdf [file SupplementalFig1.pdf]

# MRC

Medical Research Council

## Laboratory of Molecular Biology

Hills Road  
Cambridge, CB2 2QH  
England

fax (0223) 412282  
telex 81532

From : Dr. Daniel M. Brown  
telephone (0223) 248011, ext 2231  
(0223) 402231 (Direct line)

19 October 1993

**By Fax: 010 1 508 842 7762**

Dr T Pederson  
President & Scientific Director  
Worcester Foundation for Experimental Biology  
222 Maple Avenue  
Shrewsbury  
Massachusetts 01545  
U.S.A.

Dear Thoru

Thanks for your FAX concerning the incorporation of deoxypseudouridine into oligomers. It is certainly true that at least one  $\Psi$  in tRNAs - in the T $\Psi$ C sequence is involved in a base triple interaction, i.e. in stabilising tertiary structure. But I have not been following this literature for a long time and do not know how it has ramified.

We synthesised deoxy $\Psi$  a long time ago but Fox at the Sloane-Kettering and others have since done more work. My impression is that it is still not easy to synthesise it - at any rate in quantity. But I do not think that should inhibit some work along the lines you suggest. It would be interesting to look at the various H-bonding possibilities in a double- and a triple-helix. There has been work on pseudoisocytidine (Fox and/or others) and, I think, Steve Benner *et al* recently did some work with deoxypseudoisocytidine. It has two distinct potential H-bonding modes.

Since pseudouridine is produced by a bug a Japanese outfit made lots of it at one time (Fox's source). It may be available in quantity still (but not advertised). We did show that r $\Psi$   $\rightarrow$  d $\Psi$  could be effected, so that might be a way to the latter.

There are quite a number of things re  $\Psi$  that we could discuss but it would not be a bad idea if Valeri did a literature scan on materials and methods. I will arrive Worcester p.m. Sunday and be in Hybridon Monday 1 November. Please let Paul know.

All the best,



Dr D M Brown
